1 **Title**

2 No association between circulating levels of testosterone and sex  
3 hormone-binding globulin and risk of COVID-19 mortality in UK biobank

4

5 **Authors**

6 Xikang Fan<sup>1\*</sup>, Jing Yang<sup>1\*</sup>, Jiayu Wang<sup>1</sup>, Cheng Yin<sup>2</sup>, Meng Zhu<sup>1</sup>, Hongxia  
7 Ma<sup>1,3,4</sup>, Guangfu Jin<sup>1,3,4</sup>, Zhibin Hu<sup>1,3,4</sup>, Hongbing Shen<sup>1,4</sup>, Dong Hang<sup>1,4</sup>

8

9 \* Co-first authors, contributed equally.

10

11 **Affiliations**

12 <sup>1</sup> Department of Epidemiology and Biostatistics, International Joint Research  
13 Center on Environment and Human Health, Center for Global Health, School  
14 of Public Health, Nanjing Medical University, Nanjing, China, 211166;

15 <sup>2</sup> Department of Laboratory, Jiangning Hospital Affiliated to Nanjing Medical  
16 University, Nanjing, China, 211100;

17 <sup>3</sup> State Key Laboratory of Reproductive Medicine, Center for Global Health,  
18 Nanjing Medical University, Nanjing, China, 211166;

19 <sup>4</sup> Jiangsu Key Lab of Cancer Biomarkers, Prevention and Treatment,  
20 Collaborative Innovation Center for Cancer Medicine, Nanjing Medical  
21 University, Nanjing, China, 211166.

22

23 **Short title:** sex hormone and COVID-19 mortality

24

25 **Correspondence:**

26 Dong Hang, PhD

27 Department of Epidemiology and Biostatistics, School of Public Health,

28 Nanjing Medical University, 101 Longmian Avenue, Nanjing 211166, China.

29 Email: hangdong@njmu.edu.cn

30

31 **Funding**

32 This study was funded by National Natural Science Foundation of China

33 (81820108028, 81521004, and 81973127), National Key R&D Program of

34 China (2016YFC1000200 and 2017YFC0908300), and Science Foundation for

35 Excellent Young Scholars of Jiangsu (BK20190083). The funders had no role

36 in study design, data collection and analysis, decision to publish, or

37 preparation of the manuscript.

38

39 **Disclosure Summary:** The authors have nothing to disclose.

40

41 **Abbreviations**

42 COVID-19: coronavirus disease 2019; SHBG: sex hormone-binding globulin;

43 FT: free testosterone; TT: total testosterone; SARS-CoV-2: severe acute

44 respiratory syndrome coronavirus 2; NHS: National Health Service; BMI: body

45 mass index; MET, metabolic equivalent; ICD: international classification of

46 diseases; HRT: hormone replacement treatment; OR: odds ratio; CI:

47 confidence interval; SD: standard deviation.

48 **Abstract**

49 **Background:** Sex-disaggregated data suggest that men with coronavirus  
50 disease 2019 (COVID-19) are more likely to die than women. Whether  
51 circulating testosterone or sex hormone-binding globulin (SHBG) contributes  
52 to such sex differences remains unknown.

53 **Objective:** To evaluate the associations of circulating total testosterone (TT),  
54 free testosterone (FT), and SHBG with COVID-19 mortality.

55 **Design:** Prospective analysis.

56 **Setting:** UK Biobank.

57 **Participants:** We included 1306 COVID-19 patients (678 men and 628  
58 women) who had serum TT and SHBG measurements and were free of  
59 cardiovascular disease or cancer at baseline (2006-2010).

60 **Main outcome measures:** The death cases of COVID-19 were identified from  
61 National Health Service death records updated at 31 July 2020. Unconditional  
62 logistic regression was performed to estimate the odds ratio (OR) and 95%  
63 confidence intervals (CI) for mortality.

64 **Results:** We documented 315 deaths of COVID-19 (194 men and 121  
65 women). After adjusting for potential confounders, we did not find any  
66 statistically significant associations for TT (OR per 1-SD increase = 1.03, 95%  
67 CI: 0.85-1.25), FT (OR per 1-SD increase = 0.95, 95% CI: 0.77-1.17), or SHBG  
68 (OR per 1-SD increase = 1.09, 95% CI: 0.87-1.37) with COVID-19 mortality in  
69 men. Similar null results were observed in women (TT: OR per 1-SD increase

70 = 1.10, 95% CI: 0.85-1.42; FT: OR per 1-SD increase = 1.10, 95% CI:

71 0.82-1.46; SHBG: OR per 1-SD increase = 1.16, 95% CI: 0.89-1.53).

72 **Conclusions:** Our findings do not support a significant role of circulating

73 testosterone or SHBG in COVID-19 prognosis.

74

75 **Keywords:** testosterone, sex hormone, COVID-19, mortality, UK Biobank

## 76 **Introduction**

77 The coronavirus disease 2019 (COVID-19) pandemic is a global health  
78 emergency that has led to more than 870,000 deaths worldwide  
79 (<https://covid19.who.int/>). According to sex-disaggregated data from many  
80 affected countries, there seem to be sex differences in severity and mortality of  
81 the disease (1-3). Men with COVID-19 are more likely to need intensive care  
82 and to die than women, with an overall case-fatality ratio of approximately 1.7  
83 (4). Several hypotheses have been proposed to account for the difference,  
84 such as smoking, co-morbid conditions, immune responses, and sex  
85 hormones (4, 5). As the most abundant circulating androgen in men,  
86 testosterone has been suggested as an immunosuppressive factor by  
87 inhibiting B lymphopoiesis, T-helper 1 differentiation, and inflammatory  
88 cytokine production (6, 7). However, epidemiologic data are sparse regarding  
89 the association between circulating testosterone levels and COVID-19  
90 prognosis in either men or women.

91 Most circulating testosterone is tightly bound to sex hormone-binding  
92 globulin (SHBG) or weakly bound to albumin, and a minor amount exists as  
93 free testosterone (FT) (8). In the current study, we leveraged the UK Biobank  
94 resource, with recently released data on COVID-19 tests and updated death  
95 records, to examine the associations of total testosterone (TT), calculated FT,  
96 and SHBG with mortality among COVID-19 patients.

97

## 98 **Methods**

### 99 **Study design and participants**

100 UK Biobank enrolled over 500,000 community-dwelling individuals (aged  
101 37-73 years) across the UK during 2006 to 2010 (9). At the baseline  
102 assessment, participants completed self-administered touchscreen  
103 questionnaires, had physical measurements by qualified nurses, and provided  
104 blood samples.

105 According to the Public Health England database linked to UK biobank  
106 updated at 3 August 2020, a total of 9773 participants had undergone severe  
107 acute respiratory syndrome coronavirus 2 (SARS-CoV-2) tests, among whom  
108 1638 were diagnosed with COVID-19. We also included 161 participants who  
109 died from COVID-19 according to the National Health Service (NHS) death  
110 records. Exclusion criteria included COVID-19 patients who had no available  
111 data on serum TT (n=286) or SHBG (n=309), who had a self-reported history  
112 of cardiovascular disease (n=176) or cancer (n=138) at blood draw, and who  
113 died from other causes (n=22). Finally, 1306 patients with COVID-19 were  
114 included in the analysis, consisting of 678 men and 628 women.

115

### 116 **Assessment of biomarkers**

117 Serum concentrations of TT and SHBG were measured by chemiluminescent  
118 immunoassays (Beckman Coulter DXI 800), with analytical ranges of  
119 0.35-55.52 nmol/L and 0.33-242 nmol/L, respectively. A colorimetric method

120 was used to assay albumin (Beckman Coulter AU5800), with an analytical  
121 range of 15-60 g/L. Overall, the average coefficients of variation for TT, SHBG,  
122 and albumin ranged from 3.66-8.34%, 5.22-5.67%, and 2.09-2.20%,  
123 respectively. Moreover, each assay was registered with an external quality  
124 assurance scheme to verify the accuracy, showing that more than 95% of  
125 participated distributions for these biomarkers were good or acceptable. FT  
126 was calculated using a validated algorithm based on TT, SHBG, albumin, and  
127 the association constants for the binding of testosterone to SHBG and albumin  
128 (10, 11)

129

### 130 **Ascertainment of COVID-19 Mortality**

131 Date and cause of death were obtained through linkage to national death  
132 registries. Primary cause of mortality was defined using the 10th revision of the  
133 International Statistical Classification of Diseases, and the outcome of our  
134 analysis was mortality due to COVID-19 (U07). Available death data we used  
135 were last updated at 31 July 2020.

136

### 137 **Ascertainment of Covariates**

138 Information on age, sex, education, ethnicity, smoking status, and alcohol  
139 consumption was self-reported in the baseline questionnaires. Townsend  
140 deprivation index was evaluated by incorporating measures of unemployment,  
141 household overcrowding, and non-ownership of home or car. Body mass index



142 (BMI) was calculated as weight in kilograms divided by height in meters  
143 squared derived from physical measurements. Total physical activity was  
144 assessed by total metabolic equivalent task minutes per week for all activity,  
145 including walking, moderate, and vigorous activity.

146

### 147 **Statistical Analysis**

148 Testosterone and SHBG concentrations were log-transformed to improve  
149 normality. Because the date of SARS-CoV-2 testing did not represent the date  
150 of getting infected, the survival time from infection to death or the last follow-up  
151 could not be accurately calculated for each patient, rendering Cox regression  
152 models inapplicable in the current analysis. We used unconditional logistic  
153 regression models to estimate odds ratios (OR) and 95% confidence intervals  
154 (CI), according to quintiles and continuously per 1-standard deviation (SD)  
155 increment in hormone concentrations. The model was first adjusted for major  
156 covariates including age at infection, sex, and ethnicity (simple model), then  
157 further adjusted for Townsend deprivation index, BMI, smoking status, alcohol  
158 drinking, physical activity, and for women, menopause status and hormone  
159 replacement treatment (HRT) (full model).

160 Stratified analyses were conducted according to the median age at  
161 infection (<70, ≥70 years), sex (male, female), BMI (<30, ≥30 kg/m<sup>2</sup>), physical  
162 activity (≤median, >median), and smoking status (never, ever) in the full  
163 models. To estimate potential effect modification by these stratification

164 variables, we used a likelihood ratio test comparing the models with and  
165 without interaction terms between hormone levels and each stratification  
166 variable. In addition, sensitivity analysis was performed by excluding  
167 participants with self-rated poor overall health at baseline.

168 All analyses were performed with SAS 9.4. Statistical tests were all  
169 two-sided, and  $P < 0.05$  was regarded as statistically significant.

170

## 171 **Results**

172 Among 678 male and 628 female patients with COVID-19, 194 (28.6%) and  
173 121 (19.3%) deaths occurred, respectively. The median time from blood draw  
174 to COVID-19 testing was 11.1 years (interquartile range: 10.5-11.9 years). TT  
175 concentrations ranged from 1.96-27.45 nmol/L in men and 0.35-4.44 nmol/L in  
176 women (**Figure S1**). SHBG concentrations ranged from 2.59-133.66 nmol/L in  
177 men and 10.15-218.89 nmol/L in women.

178 **Table 1** summarizes the main characteristics of COVID-19 patients by  
179 quartiles of TT levels. FT and SHBG levels increased with TT levels. Moreover,  
180 patients with higher TT tended to be younger at blood draw. Men with higher  
181 BMI and women using HRT were more likely to have lower TT levels.

182 **Tables 2 and 3** showed the association results for the hormones and  
183 COVID-19 mortality in men and women, respectively. We did not find any  
184 statistically significant associations for TT (fully adjusted OR per 1-SD increase  
185 = 1.03, 95% CI: 0.85-1.25), FT (fully adjusted OR per 1-SD increase = 0.95, 95%

186 CI: 0.77-1.17), or SHBG (fully adjusted OR per 1-SD increase = 1.09, 95% CI:  
187 0.87-1.37) with COVID-19 mortality in men. Similar null results were observed  
188 in women (TT: fully adjusted OR per 1-SD increase = 1.10, 95% CI: 0.85-1.42;  
189 FT: fully adjusted OR per 1-SD increase = 1.10, 95% CI: 0.82-1.46; SHBG:  
190 fully adjusted OR per 1-SD increase = 1.16, 95% CI: 0.89-1.53).

191 The forest plot of stratified analyses (**Figure 1**) showed that none of the  
192 stratification variables had modification effects on TT, FT, and SHBG levels in  
193 men and women.

194 The sensitivity analysis also indicated that the hormones were not  
195 associated with COVID-19 mortality (**Tables S1 and S2**).

196

## 197 **Discussion**

198 To the best of our knowledge, this is the first study to assess the association of  
199 pre-diagnostic testosterone and SHBG levels with COVID-19 mortality. We did  
200 not observe any statistically significant associations in either men (n=678) or  
201 women (n=628), suggesting that circulating testosterone and SHBG may not  
202 play a critical role in COVID-19 prognosis.

203 In support of our findings, a prior study of 543 male patients with  
204 COVID-19 from UK Biobank did not identify any significant associations for  
205 baseline TT and SHBG levels with an increased risk of SARS-CoV-2 infection  
206 or hospitalization (12). However, in another study of 31 male patients with  
207 COVID-19 in Italy, lower TT and FT levels were associated with a higher risk of

208 clinical deterioration (intensive care unit transfer or death) (13). Meanwhile,  
209 another study of 221 male patients reported that those who died from  
210 COVID-19 had lower mean TT levels than the patients alive (14). These two  
211 smaller studies were limited by inadequate adjustment for confounders, and  
212 they measured testosterone when patients were already hospitalized with  
213 COVID-19, which could introduce reverse causation.

214       The proposed leading cause of COVID-19 deterioration is the intense  
215 inflammatory response, known as a cytokine storm, which severely damages  
216 the lung tissue and causes acute respiratory distress syndrome (15). Sex  
217 differences in the response to inflammation have been well documented and  
218 can be attributed to various factors including sex hormones (16, 17). The  
219 current study suggests that circulating testosterone and SHBG may not be  
220 implicated in COVID-19 prognosis. However, we were unable to evaluate the  
221 association between estrogens and COVID-19 mortality because the majority  
222 of estradiol measurements were below the limit of detection in UK biobank. In  
223 a published cross-sectional study, serum estradiol showed negative  
224 correlations with severity of COVID-19 and levels of cytokines related to  
225 inflammation (18). Animal experiments also showed that estrogen signaling  
226 could suppress the inflammatory reactions and decrease severe acute  
227 respiratory syndrome coronavirus titers, leading to improved survival, while  
228 androgens did not influence disease outcome in male mice (19). Therefore,  
229 further studies are warranted to clarify whether and how estrogens have a

230 beneficial effect on COVID-19 prognosis.

231       The major strengths of our study include the prospective design, reliable  
232 data on hormone levels and COVID-19, detailed data on covariates that  
233 allowed for robust confounding control, and evaluation of the associations both  
234 in men and women separately. However, two major limitations should be  
235 acknowledged. First, baseline hormones were assessed only one time, which  
236 may not reflect a long-time exposure. However, the intraclass correlation  
237 coefficients of TT and SHBG between two measurements (4 years apart in UK  
238 biobank) were 0.59 (95% CI: 0.58-0.61) and 0.86 (95% CI: 0.86-0.87),  
239 respectively, in men; 0.63 (95% CI: 0.62-0.64) and 0.81 (95% CI: 0.80-0.82),  
240 respectively, in women, indicating that a single measurement can reliably  
241 categorize average levels over at least a 4-year period (20). Second, limited by  
242 the coverage of COVID-19 testing, ascertainment bias may have occurred in  
243 the current study.

244

## 245 **Conclusions**

246 Our findings indicate that circulating levels of testosterone and SHBG are not  
247 associated with COVID-19 prognosis. Future studies may focus on other  
248 factors to unravel the mechanisms underlying sex differences in COVID-19  
249 mortality.

250

## 251 **Acknowledgments**

252 We are grateful to UK Biobank participants. This research has been conducted  
253 using the UK Biobank resource under application number 52217.

254

### 255 **Author Contributions**

256 DH was responsible for the conception and design of the study. XF and DH  
257 had full access to all the data in the study and took responsibility for the  
258 integrity of the data and the accuracy of the data analysis. XF and JY did the  
259 statistical analysis and drafted the manuscript. JW, CY, MZ, HM, GJ, ZH, and  
260 HS critically revised the manuscript for important intellectual content. All  
261 authors reviewed and approved the final manuscript.

262

### 263 **References**

- 264 1. Huang C, Wang Y, Li X, Ren L, Zhao J, Hu Y, et al. Clinical features of  
265 patients infected with 2019 novel coronavirus in Wuhan, China. *Lancet*.  
266 2020;395(10223):497-506.
- 267 2. Livingston E, Bucher K. Coronavirus Disease 2019 (COVID-19) in Italy.  
268 *Jama*. 2020.
- 269 3. Klein SL, Dhakal S, Ursin RL, Deshpande S, Sandberg K, Mauvais-Jarvis  
270 F. Biological sex impacts COVID-19 outcomes. *PLoS Pathog*.  
271 2020;16(6):e1008570.
- 272 4. Scully EP, Haverfield J, Ursin RL, Tannenbaum C, Klein SL. Considering  
273 how biological sex impacts immune responses and COVID-19 outcomes. *Nat*

- 274 Rev Immunol. 2020;20(7):442-7.
- 275 5. Chakravarty D, Nair SS, Hammouda N, Ratnani P, Gharib Y, Wagaskar V,  
276 et al. Sex differences in SARS-CoV-2 infection rates and the potential link to  
277 prostate cancer. Commun Biol. 2020;3(1):374.
- 278 6. Trigunaite A, Dimo J, Jørgensen TN. Suppressive effects of androgens on  
279 the immune system. Cell Immunol. 2015;294(2):87-94.
- 280 7. Gubbels Bupp MR, Jorgensen TN. Androgen-Induced  
281 Immunosuppression. Front Immunol. 2018;9:794.
- 282 8. Raverot V, Lopez J, Grenot C, Pugeat M, Déchaud H. New approach for  
283 measurement of non-SHBG-bound testosterone in human plasma. Anal Chim  
284 Acta. 2010;658(1):87-90.
- 285 9. Collins R. What makes UK Biobank special? Lancet.  
286 2012;379(9822):1173-4.
- 287 10. Rinaldi S, Geay A, Dechaud H, Biessy C, Zeleniuch-Jacquotte A,  
288 Akhmedkhanov A, et al. Validity of free testosterone and free estradiol  
289 determinations in serum samples from postmenopausal women by theoretical  
290 calculations. Cancer Epidemiol Biomarkers Prev. 2002;11(10 Pt 1):1065-71.
- 291 11. Södergård R, Bäckström T, Shanbhag V, Carstensen H. Calculation of free  
292 and bound fractions of testosterone and estradiol-17 beta to human plasma  
293 proteins at body temperature. J Steroid Biochem. 1982;16(6):801-10.
- 294 12. Ghazizadeh Z, Majd H, Richter M, Samuel R, Zekavat SM, Asgharian H, et  
295 al. Androgen Regulates SARS-CoV-2 Receptor Levels and Is Associated with

- 296 Severe COVID-19 Symptoms in Men. *bioRxiv*. 2020.
- 297 13. Rastrelli G, Di Stasi V, Inglese F, Beccaria M, Garuti M, Di Costanzo D, et  
298 al. Low testosterone levels predict clinical adverse outcomes in SARS-CoV-2  
299 pneumonia patients. *Andrology*. 2020.
- 300 14. Çayan S, Uğuz M, Saylam B, Akbay E. Effect of serum total testosterone  
301 and its relationship with other laboratory parameters on the prognosis of  
302 coronavirus disease 2019 (COVID-19) in SARS-CoV-2 infected male patients:  
303 a cohort study. *Aging Male*. 2020:1-11.
- 304 15. Mehta P, McAuley DF, Brown M, Sanchez E, Tattersall RS, Manson JJ, et  
305 al. COVID-19: consider cytokine storm syndromes and immunosuppression.  
306 *Lancet*. 2020;395(10229):1033-4.
- 307 16. Al-Lami RA, Urban RJ, Volpi E, Algburi AMA, Baillargeon J. Sex Hormones  
308 and Novel Corona Virus Infectious Disease (COVID-19). *Mayo Clin Proc*.  
309 2020;95(8):1710-4.
- 310 17. Giefing-Kroll C, Berger P, Lepperdinger G, Grubeck-Loebenstien B. How  
311 sex and age affect immune responses, susceptibility to infections, and  
312 response to vaccination. *Aging Cell*. 2015;14(3):309-21.
- 313 18. Ding T, Zhang J, Wang T, Cui P, Chen Z, Jiang J, et al. Potential Influence  
314 of Menstrual Status and Sex Hormones on female SARS-CoV-2 Infection: A  
315 Cross-sectional Study from Multicentre in Wuhan, China. *Clin Infect Dis*. 2020.
- 316 19. Channappanavar R, Fett C, Mack M, Ten Eyck PP, Meyerholz DK,  
317 Perlman S. Sex-Based Differences in Susceptibility to Severe Acute



318 Respiratory Syndrome Coronavirus Infection. J Immunol.  
319 2017;198(10):4046-53.  
320 20. Dashti SG, Viallon V, Simpson JA, Karahalios A, Moreno-Betancur M,  
321 English DR, et al. Explaining the link between adiposity and colorectal cancer  
322 risk in men and postmenopausal women in the UK Biobank: A sequential  
323 causal mediation analysis. Int J Cancer. 2020;147(7):1881-94.  
324

**Table 1. Baseline characteristics of COVID-19 patients according to quartiles of serum TT levels in men and women**

| Characteristic                                | Serum TT levels in men, nmol/L |                    |                     |                     | Serum TT levels in women, nmol/L |                   |                   |                   |
|-----------------------------------------------|--------------------------------|--------------------|---------------------|---------------------|----------------------------------|-------------------|-------------------|-------------------|
|                                               | Q1<br>(1.96-9.32)              | Q2<br>(9.32-11.25) | Q3<br>(11.25-13.65) | Q4<br>(13.67-27.45) | Q1<br>(0.35-0.75)                | Q2<br>(0.75-1.01) | Q3<br>(1.01-1.40) | Q4<br>(1.40-4.44) |
| Participants N                                | 169                            | 169                | 170                 | 169                 | 135                              | 135               | 135               | 135               |
| Age at blood draw, mean (SD), y               | 58.76 (8.75)                   | 56.22 (9.14)       | 57.62 (8.97)        | 56.53 (8.99)        | 56.21 (9.07)                     | 54.51 (8.84)      | 52.71 (9.48)      | 53.38 (9.65)      |
| Age at infection, mean (SD),                  | 69.91 (8.82)                   | 67.43 (9.23)       | 68.80 (9.00)        | 67.65 (8.99)        | 67.32 (9.07)                     | 65.61 (8.98)      | 63.91 (9.49)      | 64.70 (9.66)      |
| White race, No. (%)                           | 144 (85.21)                    | 144 (85.21)        | 148 (87.06)         | 148 (87.57)         | 120 (88.89)                      | 115 (85.19)       | 120 (88.89)       | 118 (87.41)       |
| Body mass index, mean (SD), kg/m <sup>2</sup> | 30.82 (4.66)                   | 28.68 (4.23)       | 28.18 (4.54)        | 26.79 (3.81)        | 29.03 (6.60)                     | 28.15 (5.41)      | 27.81 (5.50)      | 29.19 (5.93)      |
| Physical activity, mean (SD), MET-hours/w     | 46.20 (53.77)                  | 48.93 (50.76)      | 47.22 (46.24)       | 42.82 (38.66)       | 42.19 (38.11)                    | 41.68 (43.33)     | 42.76 (39.92)     | 38.48 (36.35)     |
| Townsend deprivation index, mean (SD)         | -0.11 (3.65)                   | -0.13 (3.39)       | -0.51 (3.32)        | 0.03 (3.64)         | -0.23 (3.55)                     | -0.77 (3.23)      | -0.48 (3.32)      | -0.65 (3.14)      |
| Smoking status, No. (%) <sup>a</sup>          |                                |                    |                     |                     |                                  |                   |                   |                   |
| Never                                         | 52 (30.77)                     | 76 (44.97)         | 89 (52.35)          | 71 (42.01)          | 83 (61.48)                       | 67 (49.63)        | 83 (61.48)        | 81 (60.00)        |
| Previous                                      | 88 (52.07)                     | 73 (43.20)         | 63 (37.06)          | 76 (44.97)          | 37 (27.41)                       | 42 (31.11)        | 37 (27.41)        | 40 (29.63)        |
| Current                                       | 24 (14.20)                     | 19 (11.24)         | 17 (10.00)          | 21 (12.43)          | 14 (10.37)                       | 25 (18.52)        | 15 (11.11)        | 13 (9.63)         |
| Alcohol consumption, No. (%) <sup>a</sup>     |                                |                    |                     |                     |                                  |                   |                   |                   |
| Daily to three times a week                   | 73 (43.20)                     | 62 (36.69)         | 76 (44.71)          | 79 (46.75)          | 32 (23.70)                       | 31 (22.96)        | 38 (28.15)        | 38 (28.15)        |
| Twice a week to once a month                  | 61 (36.09)                     | 67 (39.64)         | 62 (36.47)          | 60 (35.50)          | 58 (42.96)                       | 54 (40.00)        | 57 (42.22)        | 58 (42.96)        |
| Never or special                              | 32 (18.93)                     | 39 (23.08)         | 32 (18.82)          | 30 (17.75)          | 44 (32.59)                       | 50 (37.04)        | 39 (28.89)        | 39 (28.89)        |

occasions only

|                        |               |               |               |               |               |               |               |               |
|------------------------|---------------|---------------|---------------|---------------|---------------|---------------|---------------|---------------|
| Had menopause, No. (%) | NA            | NA            | NA            | NA            | 70 (51.85)    | 66 (48.89)    | 60 (44.44)    | 60 (44.44)    |
| Ever used HRT, No. (%) | NA            | NA            | NA            | NA            | 54 (40.00)    | 43 (31.85)    | 32 (23.70)    | 29 (21.48)    |
| SHBG, nmol/L           | 27.62 (11.13) | 33.30 (12.18) | 39.34 (11.43) | 53.17 (22.18) | 57.07 (29.76) | 61.39 (31.20) | 63.11 (28.18) | 58.97 (30.56) |
| FT, nmol/L             | 0.13 (0.03)   | 0.16 (0.04)   | 0.17 (0.04)   | 0.19 (0.07)   | 0.006 (0.002) | 0.008 (0.003) | 0.011 (0.004) | 0.018 (0.009) |

Abbreviations: TT, total testosterone; MET, metabolic equivalent; HRT, hormone-replacement therapy; NA, not applicable; SHBG, sex hormone-binding globulin; FT, free testosterone.

<sup>a</sup> The total did not sum to 100% because small proportions of participants chose "prefer not to answer" on some questions.

**Table 2. Associations of serum TT, FT, and SHBG levels with COVID-19 mortality in men**

|                                          | Q1         | Q2               | Q3               | Q4               | <i>P</i> -trend | OR per 1-SD increment <sup>c</sup> |
|------------------------------------------|------------|------------------|------------------|------------------|-----------------|------------------------------------|
| Quartile of serum TT levels, OR (95% CI) |            |                  |                  |                  |                 |                                    |
| Cutpoints, nmol/L                        | 1.96-9.32  | 9.32-11.25       | 11.25-13.65      | 13.67-27.45      |                 |                                    |
| No. of cases                             | 49         | 48               | 58               | 39               |                 |                                    |
| Simple model <sup>a</sup>                | ref        | 1.31 (0.78-2.21) | 1.54 (0.93-2.55) | 0.93 (0.54-1.58) | 0.99            | 1.00 (0.83-1.20)                   |
| Full model <sup>b</sup>                  | ref        | 1.39 (0.81-2.38) | 1.71 (1.00-2.93) | 1.02 (0.58-1.81) | 0.73            | 1.03 (0.85-1.25)                   |
| Quartile of FT levels, OR (95% CI)       |            |                  |                  |                  |                 |                                    |
| Cutpoints, nmol/L                        | 0.04-0.13  | 0.13-0.15        | 0.15-0.19        | 0.19-0.58        |                 |                                    |
| No. of cases                             | 61         | 48               | 40               | 29               |                 |                                    |
| Simple model <sup>a</sup>                | ref        | 0.98 (0.59-1.62) | 0.94 (0.55-1.60) | 0.98 (0.54-1.79) | 0.67            | 0.96 (0.78-1.17)                   |
| Full model <sup>b</sup>                  | ref        | 0.97 (0.58-1.63) | 0.92 (0.53-1.58) | 0.97 (0.53-1.78) | 0.64            | 0.95 (0.77-1.17)                   |
| Quartile of SHBG levels, OR (95% CI)     |            |                  |                  |                  |                 |                                    |
| Cutpoints, nmol/L                        | 2.59-25.99 | 26.16-35.32      | 35.34-46.57      | 46.65-133.66     |                 |                                    |
| No. of cases                             | 31         | 46               | 44               | 58               |                 |                                    |
| Simple model <sup>a</sup>                | ref        | 1.23 (0.68-2.20) | 0.83 (0.46-1.49) | 1.11 (0.62-1.98) | 0.64            | 1.05 (0.85-1.30)                   |
| Full model <sup>b</sup>                  | ref        | 1.33 (0.73-2.44) | 0.89 (0.48-1.63) | 1.20 (0.65-2.22) | 0.44            | 1.09 (0.87-1.37)                   |

Abbreviations: TT, total testosterone; FT, free testosterone; SHBG, sex hormone-binding globulin; OR, odds ratio; CI, confidence interval; ref, reference.

<sup>a</sup> Adjusted for age at infection, sex, and race.

<sup>b</sup> Additionally adjusted for Townsend deprivation index, body mass index, smoking status, alcohol drinking, and physical activity.

<sup>c</sup> SD was the standard deviation of log-transformed hormone levels: 0.31 for TT, 0.31 for FT, and 0.46 for SHBG.

**Table 3. Associations of serum TT, FT, and SHBG levels with COVID-19 mortality in women**

|                                          | Q1          | Q2               | Q3               | Q4               | P-trend | OR per 1-SD increment <sup>c</sup> |
|------------------------------------------|-------------|------------------|------------------|------------------|---------|------------------------------------|
| Quartile of serum TT levels, OR (95% CI) |             |                  |                  |                  |         |                                    |
| Cutpoints, nmol/L                        | 0.35-0.75   | 0.75-1.01        | 1.01-1.40        | 1.40-4.44        |         |                                    |
| No. of cases                             | 26          | 26               | 16               | 28               |         |                                    |
| Simple model <sup>a</sup>                | ref         | 1.25 (0.64-2.46) | 0.75 (0.35-1.57) | 1.49 (0.76-2.93) | 0.41    | 1.11 (0.87-1.42)                   |
| Full model <sup>b</sup>                  | ref         | 1.17 (0.57-2.39) | 0.71 (0.32-1.57) | 1.38 (0.68-2.81) | 0.46    | 1.10 (0.85-1.42)                   |
| Quartile of FT levels, OR (95% CI)       |             |                  |                  |                  |         |                                    |
| Cutpoints, nmol/L                        | 0.002-0.006 | 0.006-0.009      | 0.009-0.013      | 0.013-0.070      |         |                                    |
| No. of cases                             | 23          | 17               | 20               | 26               |         |                                    |
| Simple model <sup>a</sup>                | ref         | 0.75 (0.36-1.59) | 0.87 (0.42-1.81) | 1.37 (0.67-2.80) | 0.11    | 1.24 (0.95-1.60)                   |
| Full model <sup>b</sup>                  | ref         | 0.79 (0.36-1.74) | 0.75 (0.35-1.63) | 1.05 (0.48-2.31) | 0.53    | 1.10 (0.82-1.46)                   |
| Quartile of SHBG levels, OR (95% CI)     |             |                  |                  |                  |         |                                    |
| Cutpoints, nmol/L                        | 10.15-37.58 | 37.63-54.35      | 54.42-76.08      | 76.98-218.89     |         |                                    |
| No. of cases                             | 28          | 28               | 29               | 26               |         |                                    |
| Simple model <sup>a</sup>                | ref         | 1.19 (0.62-2.27) | 1.42 (0.74-2.71) | 0.91 (0.47-1.77) | 0.86    | 0.98 (0.78-1.24)                   |
| Full model <sup>b</sup>                  | ref         | 1.48 (0.75-2.93) | 1.99 (0.97-4.09) | 1.46 (0.68-3.14) | 0.28    | 1.16 (0.89-1.53)                   |

Abbreviations: TT, total testosterone; FT, free testosterone; SHBG, sex hormone-binding globulin; OR, odds ratio; CI, confidence interval; ref, reference.

<sup>a</sup> Adjusted for age at infection, sex, and race.

<sup>b</sup> Additionally adjusted for Townsend deprivation index, body mass index, smoking status, alcohol drinking, physical activity, menopause status, and hormone replacement treatment.

<sup>c</sup> SD was the standard deviation of log-transformed hormone levels: 0.46 for TT, 0.59 for FT, and 0.51 for SHBG.

325 **Figure Legend**

326 **Figure 1.** Forest plots of stratified analysis for the associations of serum total  
327 testosterone, free testosterone, and sex hormone-binding globulin levels with  
328 COVID-19 mortality.

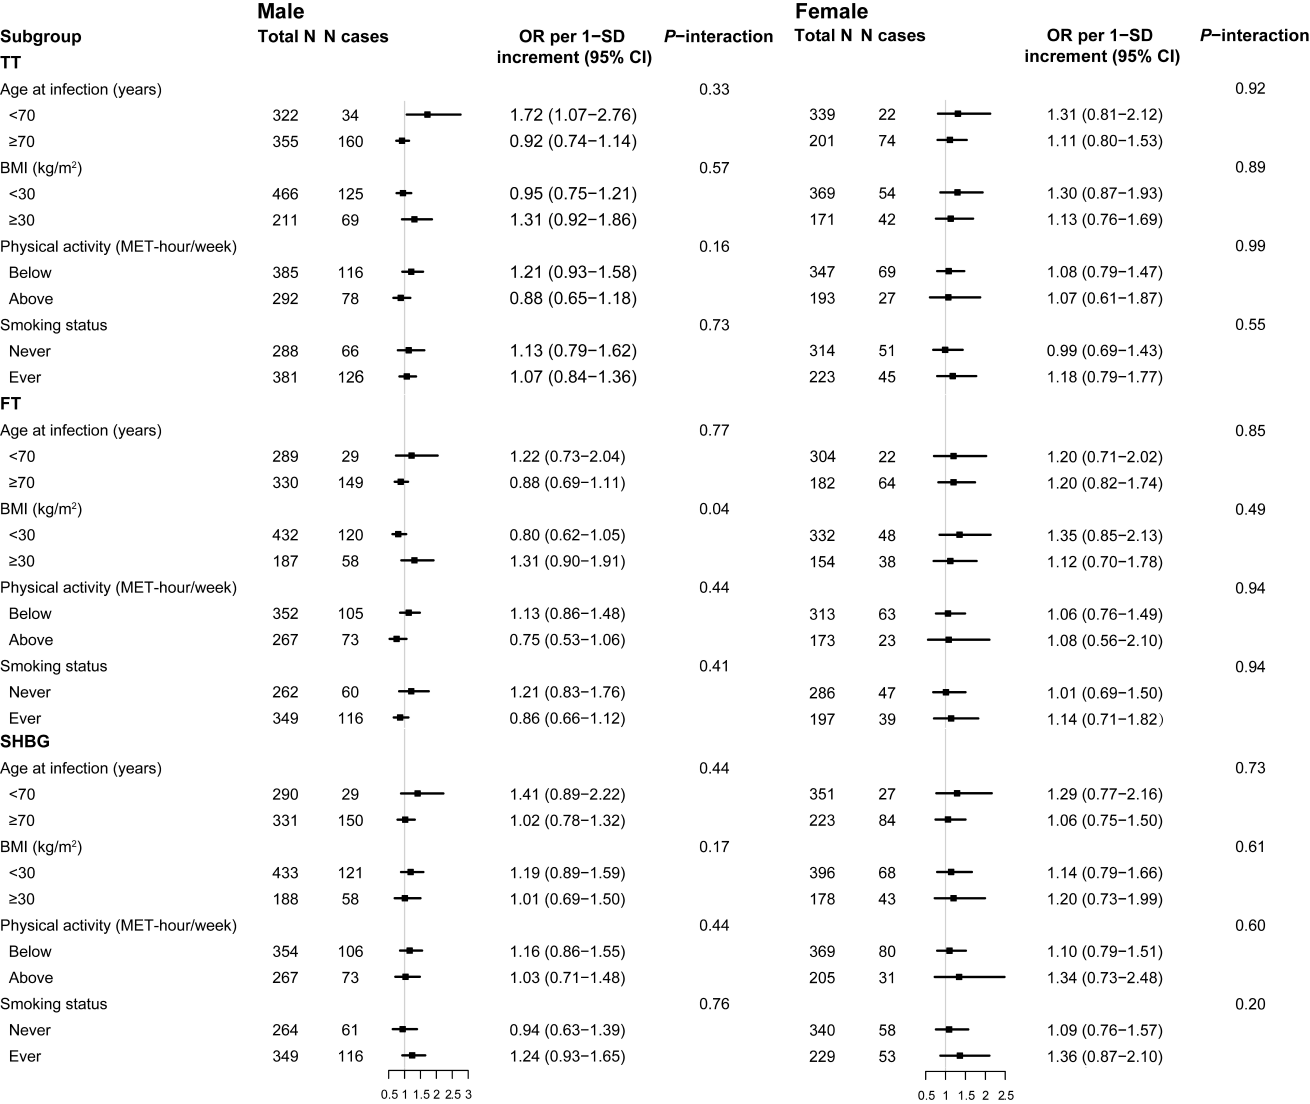

Source: https://www.medrxiv.org/content/10.1101/2020.09.11.20191783v1.full.pdf
